# Supplementary material for: Knowledge, Attitude and Worry in the Kurdistan Region of Iraq during the Mpox (Monkeypox) Outbreak in 2022: An Online Cross-Sectional Study
Source: MDPI journal article supplement (doi:10.3390/vaccines11030610), 2023-03-08
Supplement: s1 [file s1]

## Knowledge, Attitude and Worry in the Kurdistan Region of Iraq During the Mpox (Monkeypox) Outbreak in 2022: An Online Cross-sectional Study

### Consent question: -

This survey aims to assess the knowledge, attitude, and worry about monkeypox among general population of Kurdistan Region. You are then kindly invited to answer the following online survey (on your computer or your mobile phone). We would like to kindly ask you to do your best to answer all questions, if possible, because this will allow us to anonymously process and analyze the data, and thus, improve the knowledge in the field.

Part 1: Socio-demographic characteristics.

| Characteristics              | Participants N (%) |
|------------------------------|--------------------|
| Age in years                 |                    |
| Gender                       |                    |
| Male                         |                    |
| Female                       |                    |
| Marital status               |                    |
| Single                       |                    |
| Married                      |                    |
| Others                       |                    |
| Religion                     |                    |
| Islam                        |                    |
| Christian                    |                    |
| Others                       |                    |
| Level of Education           |                    |
| Ability to read and/or write |                    |
| Middle/High School           |                    |
| Diploma                      |                    |
| Bachelor                     |                    |
| Master and above             |                    |
| Geographic distribution      |                    |
| Sulaimani                    |                    |
| Erbil                        |                    |
| Duhok                        |                    |
| Halabja                      |                    |

Part 2: Knowledge of participants about monkeypox epidemic (Three Likert scale and checkboxes questionnaire).

| Questions                                                                        | True | False | I don't know |
|----------------------------------------------------------------------------------|------|-------|--------------|
| 1. Case isolating a person with symptoms stop the spread of the monkeypox virus? | True | False | I don't know |
| 2. Pets at the home able to transmit monkeypox virus?                            | True | False | I don't know |
| 3. Monkeypox is a viral disease infection?                                       | Yes  | No    |              |
| 4. Before 2022 have you heard about monkeypox virus infection                    | Yes  | No    |              |
| 5. Attended lectures/discussions about monkeypox virus infection                 | Yes  | No    |              |

|                                                                     |
|---------------------------------------------------------------------|
| 6. MPX may be transmitted through                                   |
| Touching                                                            |
| Sneezing                                                            |
| Sexual intercourse                                                  |
| Food                                                                |
| All the above                                                       |
| 7. Symptoms of monkeypox infection are                              |
| Fever                                                               |
| Headache                                                            |
| Muscle aches and backache                                           |
| Chills                                                              |
| Exhaustion                                                          |
| Swollen lymph nodes                                                 |
| Skin rash                                                           |
| 8. What is your source information about monkeypox virus infection? |
| Social media                                                        |
| Television and news papers                                          |
| friends                                                             |

Part 3: Attitude of participants about monkeypox epidemic (Three-Likert scale).

| Questions                                                                                                                     | Yes | No | I don't know |
|-------------------------------------------------------------------------------------------------------------------------------|-----|----|--------------|
| 1. Patients with monkeypox infection, who are declared cured should not be allowed to stay within the community at this time? |     |    |              |
| 2. If made available, would you receive monkeypox vaccine?                                                                    |     |    |              |
| 3. Do you think traveling across/within the country is safe during these times?                                               |     |    |              |
| 4. Do you agree that the monkeypox will finally be successfully controlled?                                                   |     |    |              |

Part 4: Worry related to monkeypox outbreak in 2022 (Five-Likert scale).

| Over the last 2 weeks, how often have you been bothered by the following problems?                                                            | Never | Rarely | sometimes | Often | Always |
|-----------------------------------------------------------------------------------------------------------------------------------------------|-------|--------|-----------|-------|--------|
| 1. From the last 2 weeks how often do you think about monkeypox outbreak?                                                                     |       |        |           |       |        |
| 2. From the last 2 weeks how often you feel paranoid about contacting monkeypox virus infection?                                              |       |        |           |       |        |
| 3. From the last 2 weeks how, often you avoid social contact?                                                                                 |       |        |           |       |        |
| 4. From the last 2 weeks, how often you have talked to your friends about the monkeypox epidemic?                                             |       |        |           |       |        |
| 5. From the last 2 weeks, how often you have had difficulty sleeping by being worried about the monkeypox epidemic?                           |       |        |           |       |        |
| 6. From the last 2 weeks, how often you feel affected by the posts on social media about monkeypox virus infection?                           |       |        |           |       |        |
| 7. From the last 2 weeks, how often do you feel worried about yourself, and close ones regarding the spread of monkeypox viral Infection?     |       |        |           |       |        |
| 8. From the last 2 weeks, how often does the Idea of monkeypox viral Infection freak you out leading to inappropriate behaviours with anyone? |       |        |           |       |        |
| 9. From the last 2 weeks, how often does the Idea of monkeypox viral Infection freak you out post on social media?                            |       |        |           |       |        |

**References**

28. Harapan, H.; Setiawan, A.M.; Yufika, A.; Anwar, S.; Wahyuni, S.; Asrizal, F.W.; Sufri, M.R.; Putra, R.P.; Wijayanti, N.P.; Salwiyadi, S. Knowledge of Human Monkeypox Viral Infection among General Practitioners: A Cross-Sectional Study in Indonesia. *Pathog. Glob. Health* **2020**, *114*, 68–75.
33. Riccò, M.; Ferraro, P.; Camisa, V.; Satta, E.; Zaniboni, A.; Ranzieri, S.; Baldassarre, A.; Zaffina, S.; Marchesi, F. When a Neglected Tropical Disease Goes Global: Knowledge, Attitudes and Practices of Italian Physicians towards Monkeypox, Preliminary Results. *Trop. Med. Infect. Dis.* **2022**, *7*, 135.
39. Roy, D.; Tripathy, S.; Kar, S.K.; Sharma, N.; Verma, S.K.; Kaushal, V. Study of Knowledge, Attitude, Anxiety & Perceived Mental Healthcare Need in Indian Population during COVID-19 Pandemic. *Asian J. Psychiatr.* **2020**, *51*, 102083.
